# Supplementary material for: A new paravian dinosaur from the Late Jurassic of North America supports a late acquisition of avian flight
Source: PeerJ. 2019 Jul 10;7:e7247. doi: 10.7717/peerj.7247 (PMC6626525; doi:10.7717/peerj.7247)
Supplement: Supplemental Information 3 — Nexus file with phylogenetic scorings, character definitions and state definitions to facilitate comparisons with other data matrices. [file peerj-07-7247-s003.nex]

#NEXUS
[ File saved by NDE version 0.5.0, Tue Mar 05 19:27:03 2019 ]
BEGIN TAXA;
	DIMENSIONS NTAX=501;
	TAXLABELS
		Dilophosaurus
		Sinosaurus
		Cryolophosaurus
		Tachiraptor
		Berberosaurus
		Genyodectes
		Ceratosaurus
		Eoabelisaurus
		Rugops
		Rajasaurus
		Genusaurus
		Arcovenator
		Majungasaurus
		Dahalokely
		Rahiolisaurus
		'MCF PVPH 237'
		Xenotarsosaurus
		Ilokelesia
		Ekrixinatosaurus
		Skorpiovenator
		Viavenator
		Carnotaurus
		Aucasaurus
		Abelisaurus
		Noasaurus
		Velocisaurus
		Masiakasaurus
		Elaphrosaurus
		Afromimus
		Limusaurus
		Deltadromeus
		Gualicho
		'Angeac taxon'
		Chuandongocoelurus
		Monolophosaurus
		Pandoravenator
		Piatnitzkysaurus
		Condorraptor
		Marshosaurus
		Poekilopleuron
		Duriavenator
		Megalosaurus
		Torvosaurus
		Wiehenvenator
		Dubreuillosaurus
		Afrovenator
		Leshansaurus
		Eustreptospondylus
		Cristatusaurus
		Baryonyx
		Ichthyovenator
		Irritator
		'Spinosaurus sensu lato'
		Kaijiangosaurus
		Erectopus
		Xuanhanosaurus
		Yangchuanosaurus
		Shidaisaurus
		Metriacanthosaurus
		'Sinraptor dongi'
		hepingensis
		Siamotyrannus
		'MNNGAD Kryptops postcran'
		Allosaurus
		Saurophaganax
		Neovenator
		Acrocanthosaurus
		Labocania
		Shaochilong
		Concavenator
		Kelmayisaurus
		Carcharodontosaurus
		iguidensis
		Tyrannotitan
		Mapusaurus
		Giganotosaurus
		Datanglong
		Gasosaurus
		Lourinhanosaurus
		Chilantaisaurus
		Fukuiraptor
		Australovenator
		Megaraptor
		Murusraptor
		Orkoraptor
		Aerosteon
		Kileskus
		Proceratosaurus
		Guanlong
		Mirischia
		Sinotyrannus
		Yutyrannus
		Dilong
		Juratyrant
		Xiongguanlong
		Eotyrannus
		Alectrosaurus
		Appalachiosaurus
		Bistahieversor
		Raptorex
		Gorgosaurus
		Alioramus
		Tyrannosaurus
		Coelurus
		Tanycolagreus
		Aristosuchus
		Bicentenaria
		Xinjiangovenator
		Zuolong
		Zuni
		Ornitholestes
		Sinocalliopteryx
		Huaxiagnathus
		Juravenator
		Aniksosaurus
		Archaeornithoides
		Scipionyx
		Tugulusaurus
		Sinosauropteryx
		Santanaraptor
		Haplocheirus
		Compsognathus
		Sciurumimus
		NGMC2124
		Aorun
		'Naze dromaeosaur'
		Deinocheirus
		Hexing
		Shenzhousaurus
		Harpymimus
		Nedcolbertia
		Arkansaurus
		'Archaeornithomimus asiaticus'
		GIN960910KD
		Beishanlong
		Garudimimus
		Aepyornithomimus
		Sinornithomimus
		Ornithomimus
		'Cerro del Pueblo orn'
		Tototlmimus
		mongoliensis
		MNAPl1762A
		'sedens holotype only'
		Rativates
		Struthiomimus
		'Gallimimus bullatus'
		Timimus
		Anserimimus
		Qiupalong
		Dromiceiomimus
		Kinnareemimus
		Fukuivenator
		Nqwebasaurus
		Pelecanimimus
		Patagonykus
		Xiyunykus
		Bonapartenykus
		Bannykus
		Alvarezsaurus
		Achillesaurus
		Alnashetri
		Albertonykus
		Ceratonykus
		Qiupanykus
		Albinykus
		Xixianykus
		Linhenykus
		Heptasteornis
		Bradycneme
		Parvicursor
		'Tugrik parvicursorine'
		Shuvuuia
		Mononykus
		Martharaptor
		Falcarius
		Jianchangosaurus
		Beipiaosaurus
		Alxasaurus
		Enigmosaurus
		zheziangensis
		Suzhousaurus
		Neimongosaurus
		Erliansaurus
		'Therizinosaurus minus hindlimb'
		'Nanchao embryos'
		'Nanshiungosaurus brevispinus'
		bohlini
		AMNH6368
		Segnosaurus
		Erlikosaurus
		'Nothronychus mckinleyi'
		graffami
		Protarchaeopteryx
		Similicaudipteryx
		Ganzhousaurus
		Caudipteryx
		Shanyangosaurus
		Kol
		Avimimus
		Machairasaurus
		'Caenagnathasia dentaries only'
		Hagryphus
		Apatoraptor
		'Leptorhynchos gaddisi'
		'Elmisaurus rarus'
		elegans
		'Chirostenotes sensu lato'
		Anzu
		Luoyanggia
		Incisivosaurus
		Microvenator
		Beibeilong
		Gigantoraptor
		Tongtianlong
		Oviraptor
		Banji
		Yulong
		Huanansaurus
		Wulatelong
		Corythoraptor
		NXMV
		Nomingia
		Rinchenia
		Nankangia
		IVPPV9608
		IGM10042
		Citipati
		Anomalipes
		Shixinggia
		Khaan
		Conchoraptor
		Jiangxisaurus
		Nemegtomaia
		Heyuannia
		yanshini
		Scansoriopteryx
		Yi
		Epidexipteryx
		Pedopenna
		Caihong
		Serikornis
		Anchiornis
		Aurornis
		Eosinopteryx
		Ostromia
		Archaeopteryx
		Shanag
		BYU2023
		ISMDVP09
		Halszkaraptor
		Mahakala
		Ningyuansaurus
		Austroraptor
		Buitreraptor
		Pamparaptor
		Ornithodesmus
		Pyroraptor
		Rahonavis
		'Unenlagia sensu lato'
		Dakotaraptor
		Mei
		Xiaotingia
		Sinovenator
		Jianianhualong
		IGM100140
		'IGM100972 100974'
		Almas
		Philovenator
		Jinfengopteryx
		Liaoningvenator
		IGM1001128
		IGM10044
		Daliansaurus
		Tochisaurus
		Hesperornithoides
		Sinusonasus
		Xixiasaurus
		Byronosaurus
		Sinornithoides
		IVPPV11119
		Gobivenator
		'Urbacodon mandibular only'
		Geminiraptor
		Borogovia
		Saurornithoides
		Zanabazar
		'Troodon sensu lato'
		Talos
		Linhevenator
		Tianyuraptor
		Zhenyuanlong
		Acheroraptor
		Bambiraptor
		Variraptor
		Sinornithosaurus
		Microraptor
		Zhongjianosaurus
		osmolskae
		NGMC91
		Changyuraptor
		Graciliraptor
		Yurgovuchia
		Deinonychus
		Utahraptor
		Achillobator
		Yixianosaurus
		Pneumatoraptor
		'Saurornitholestes langstoni'
		Atrociraptor
		'IGM10022 10023'
		'Itemirus holotype only'
		Linheraptor
		Tsaagan
		Dromaeosaurus
		Hulsanpes
		IGM100980
		'Velociraptor mongoliensis'
		Luanchuanraptor
		Adasaurus
		'DGBU 78'
		Zhongornis
		'Hesperonychus holotype only'
		Balaur
		Bauxitornis
		Sapeornis
		Zhongjianornis
		jianchangensis
		Jeholornis
		Jixiangornis
		Yangavis
		Eoconfuciusornis
		Proornis
		'Confuciusornis sanctus'
		dui
		chuonzhous
		Elopteryx
		Changchengornis
		Chongmingia
		Yandangornis
		Jinguofortis
		Wyleyia
		Protopteryx
		Paraprotopteryx
		Orienantius
		Eopengornis
		Pengornis
		Elsornis
		Otogornis
		Yungavolucris
		Noguerornis
		Iberomesornis
		'LP 4450 IEI'
		Concornis
		Cruralispennia
		Bohaiornis
		Parabohaiornis
		Longusunguis
		Shenqiornis
		Sulcavis
		Zhouornis
		Fortunguavis
		Dunhuangia
		Yuanjiawaornis
		Eoenantiornis
		Huoshanornis
		Grabauornis
		Jibeinia
		Hebeiornis
		Gobipipus
		Gobipteryx
		Nanantius
		Gurilynia
		Holbotia
		Evgenavis
		Enantiophoenix
		Parvavis
		Monoenantiornis
		chabuensis
		Junornis
		Eocathayornis
		Houornis
		aberransis
		'Cathayornis yandica'
		Sinornis
		Linyiornis
		Gracilornis
		Alethoalaornis
		Cuspirostrisornis
		Dapingfangornis
		Largirostrornis
		Longchengornis
		Microenantiornis
		Piscivorenantiornis
		Pterygornis
		Dalingheornis
		GMV2158
		GMV2159
		Liaoxiornis
		Avisaurus
		Gettyia
		Mirarce
		Soroavisaurus
		Neuquenornis
		Intiornis
		'Enantiornis pectoral wing only'
		'Elbretornis holotype only'
		'Martinavis cruzyensis'
		vincei
		saltariensis
		minor
		whetstonei
		Cratoavis
		Qiliania
		Feitianius
		'CAGS IG 02 0901'
		'CAGS IG 04 CM 007'
		'CAGS IG 04 CM 023'
		Boluochia
		Longipteryx
		Shengjingornis
		Shanweiniao
		Longirostravis
		Rapaxavis
		Halimornis
		Flexomornis
		Alexornis
		Xiangornis
		Eoalulavis
		Liaoningornis
		Vorona
		Lectavis
		Hollanda
		Aberratiodontus
		Bellulornis
		Archaeorhynchus
		Patagopteryx
		PMO228.582
		Hongshanornis
		Archaeornithura
		Jianchangornis
		Schizooura
		Chaoyangia
		Changmaornis
		guozhangi
		Changzuiornis
		'Yanornis martini'
		Yixianornis
		Songlingornis
		Tianyuornis
		Parahongshanornis
		Longicrusavis
		Iteravis
		Gansus
		Ambiortus
		Yumenornis
		Dingavis
		Juehuaornis
		Piscivoravis
		Mystiornis
		Ichthyornis
		Gargantuavis
		Potamornis
		Enaliornis
		Chupkaornis
		Pasquiaornis
		Baptornis
		Bmongoliensis
		baileyi
		varneri
		Fumicollis
		Parahesperornis
		Hesperornis
		Xinghaiornis
		Horezmavis
		Maaqwi
		Jiuquanornis
		Eogranivora
		Qinornis
		Iaceornis
		Palintropus
		Apsaravis
		Lithornis
		Palaeotis
		Limenavis
		Struthio
		Tingmiatornis
		Chauna
		Polarornis
		Vegavis
		Anatalavis
		Presbyornis
		Teviornis
		Anas
		Gallinuloides
		Paraortygoides
		Sylviornis
		Meleagris
		Cerebavis
		Foro
		Columba
		;
ENDBLOCK;
BEGIN CHARACTERS;
	DIMENSIONS NCHAR=700;
	FORMAT DATATYPE=STANDARD MISSING=? GAP=- SYMBOLS="0123456789N";
	CHARLABELS
		[1] 'Primary and secondary remiges - width of leading vane '
		[2] 'External naris - posterior extent with maxilla ventral border horizontal '
		[3] 'Nasal - dorsolateral surface posterior to external naris '
		[4] 'Maxilla - lateral surface of antorbital fossa anterior to antorbital fenestra '
		[5] 'Maxilla - lateral surface at ventral margin of antorbital fossa '
		[6] 'Maxilla - anteroposterior position of maxillary fenestra '
		[7] 'Maxilla - lateral surface at anterior margin of antorbital fossa '
		[8] 'Orbit - length compared to height '
		[9] 'Postorbital - shape of anterior margin of ventral process '
		[10] 'Jugal and postorbital - convexity of posterior edge of postorbital bar '
		[11] 'Suborbital fenestra - size '
		[12] 'Braincase - separation of anterior tympanic and subotic recesses '
		[13] 'Basisphenoid - number of paired large foramina in basisphenoid recess '
		[14] 'Opisthotic - lateral extent of interfenestral crest '
		[15] 'Exoccipital - convexity of posterior surface containing vagus (X), accessory (XI) and hypoglossal (XII) nerve foramina'
		[16] 'Basisphenoid - pneumatic invasion of dorsolateral surface of basipterygoid process '
		[17] 'Basisphenoid - pneumatic invasion of surface ventral to otic recess '
		[18] 'Basioccipital and basisphenoid - position of basisphenoid recess '
		[19] 'Basisphenoid - pneumatic invasion of ventral surface '
		[20] 'Parasphenoid - transverse expansion of base of cultriform process '
		[21] 'Basisphenoid - transverse angle of basipterygoid process '
		[22] 'Basisphenoid - length of basipterygoid process '
		[23] 'Basisphenoid - pneumatic invasion of interior of basipterygoid process '
		[24] 'Prootic - pneumatic invasion of lateral surface '
		[25] 'Opisthotic - pneumatic invasion of surface dorsal to interfenestral crest '
		[26] 'Opisthotic - pneumatic invasion of lateral surface of paroccipital process or inside otic recess '
		[27] 'Opisthotic - position of main entrance of posterior tympanic recess '
		[28] 'Premaxilla - length of subnarial process'
		[29] 'Premaxillae - cross section of combined dorsal process '
		[30] 'Premaxillae - angle of symphysis in dorsal or ventral view '
		[31] 'Premaxilla - shape of ventral edge '
		[32] 'Maxilla - posterior extent of palatal shelf'
		[33] 'Maxilla- ventral projection of posteromedial portion of palatal shelf '
		[34] 'Jugal - length of dorsal process '
		[35] 'Postorbital - length of ventral process '
		[36] 'Jugal - cross section of posterior process '
		[37] 'Jugal - pneumatization of anterodorsal surface near antorbital fossa '
		[38] 'Jugal - medial surface below postorbital process '
		[39] 'Quadratojugal - length of posterior process (defined as area posterior to intersection of ventral edge with line drawn along posterior edge of dorsal process)'
		[40] 'Quadratojugal - contact with jugal '
		[41] 'Lacrimal - projection of dorsal surface '
		[42] 'Lacrimal - lateral projection at dorsal edge '
		[43] 'Lacrimal - surface at posterodorsal corner of antorbital fossa '
		[44] 'Lacrimal - length of posterior process measured from anterior orbital edge'
		[45] 'Lacrimal - length of anterior process measured from internal corner'
		[46] 'Prefrontal - size '
		[47] 'Nasals and frontals - angle of sutures from median to lateral edge of contact '
		[48] 'Frontal - convexity of supratemporal fossa edge '
		[49] 'Frontal - shape of orbital margin '
		[50] 'Frontal - shape of anterior edge of nasolacrimal articular surface '
		[51] 'Postorbital - curvature of anterior process '
		[52] 'Parietals - median proximity of supratemporal fossae '
		[53] 'Parietals - median contact '
		[54] 'Squamosal - angle of ventral process '
		[55] 'Squamosal - lateral surface '
		[56] 'Quadratojugal - extent of squamosal contact '
		[57] 'Quadrate - divergence of otic articular surface '
		[58] 'Quadrate - orientation of posterior edge compared to ventral margin of jugal + quadratojugal'
		[59] 'Quadrate - width from the paraquadrate foramen medial edge to the lateral edge of the dorsal quadrate '
		[60] 'Quadrate - pneumaticity '
		[61] 'Foramen magnum - dorsoventral elongation '
		[62] 'Exoccipital and basioccipital - lateral margin of occipital condyle '
		[63] 'Exoccipital - length of paroccipital process '
		[64] 'Exoccipital - orientation of paroccipital process '
		[65] 'Exoccipital - torsion of paroccipital process '
		[66] 'Ectopterygoid - ventromedial surface '
		[67] 'Ectopterygoid - dorsal surface '
		[68] 'Pterygoid - size of posterolateral flange anterior to basipterygoid articulation'
		[69] 'Palatine - development of jugal process '
		[70] 'Ectopterygoid - palatine contact '
		[71] 'Dentary - medial curvature of symphyseal region '
		[72] 'Surangular - shape of dorsal margin '
		[73] 'Dentary - amount of anterior taper '
		[74] 'Dentary - curvature in lateral view'
		[75] 'Dentary - lateral surface of posterior dentary '
		[76] 'Dentary - length of posterodorsal process '
		[77] 'Dentary - position of lateral nutrient foramina '
		[78] 'Surangular - shape of external mandibular fenestra border '
		[79] 'Prearticular - concavity of anteroventral margin '
		[80] 'Surangular - size of posterior foramen '
		[81] 'Splenial - lateral exposure '
		[82] 'Coronoid - size'
		[83] 'Articular - dorsal surface of medial retroarticular process '
		[84] 'Articular - retroarticular process elongation '
		[85] 'Articular - dorsal surface of glenoid '
		[86] 'Premaxilla - presence of teeth '
		[87] 'Premaxilla - size of second premaxillary tooth compared to third and fourth premaxillary teeth '
		[88] 'Maxilla - presence of teeth '
		[89] 'Lateral teeth - serration extent '
		[90] 'Dentary - number of teeth '
		[91] 'Lateral teeth - largest crown height '
		[92] 'Teeth - serration size '
		[93] 'Teeth - distal serration shape '
		[94] 'Teeth - crown root transition '
		[95] 'Dentary teeth - size of anterior teeth '
		[96] 'Dentary teeth - difference in spacing between anterior and posterior teeth '
		[97] 'Premaxilla, maxilla and dentary - medial bone between teeth '
		[98] 'Dorsal vertebrae - separation of postzygapophyses '
		[99] 'Premaxillary teeth - convexity of lingual surface '
		[100] 'Cervical vertebrae - number '
		[101] 'Cervical vertebrae - posterior extent of epipophyses on axis '
		[102] 'Axis - development of spinopostzygapophyseal lamina'
		[103] 'Cervical vertebrae - anteroposterior position of epipophyses '
		[104] 'Cervical vertebrae - posterior extent of centrum on cervicals 3-4 '
		[105] 'Cervical vertebrae - anteroventral surface of cervicals 9-10 '
		[106] 'Cervical vertebrae - anterior central articular surface dimensions of cervicals 3-4 '
		[107] 'Cervical vertebrae - neural spine anteroposterior length of cervicals 3-5 '
		[108] 'Cervical vertebrae - number of pneumatic foramina in each centrum '
		[109] 'Cervical vertebrae - convexity of anterior articular surface '
		[110] 'Dorsal vertebrae - convexity of anterior articular surface of centra 1-3'
		[111] 'Dorsal vertebrae - hypapophysis size on dorsals 1-3 '
		[112] 'Dorsal vertebrae - lateral projection of parapophyses on dorsals 6-13 '
		[113] 'Dorsal vertebrae - orientation of medial postzygapophyseal edge - undifferentiated from postzygapophyseal facet '
		[114] 'Dorsal vertebrae - extent of central pleurocoels in series'
		[115] 'Dorsal vertebrae - lateral extent of transverse processes on dorsals 1-4 '
		[116] 'Dorsal vertebrae - transverse width of neural spine distal tip '
		[117] 'Sacral vertebrae - number'
		[118] 'Sacral vertebrae - ventral surface of posterior centra '
		[119] 'Sacral vertebrae - number of vertebrae with central pneumatic foramina'
		[120] 'Sacral vertebrae - convexity of posterior articular surface of last sacral centrum '
		[121] 'Sacral vertebrae - dorsal connection of zygapophyses '
		[122] 'Caudal vertebrae - number with transverse processes of any size '
		[123] 'Caudal vertebrae - transverse section of proximal centra '
		[124] 'Caudal vertebrae - ventral surface of centra 1-2'
		[125] 'Caudal vertebrae - dorsal outline of neural spines in caudals ~5-30 '
		[126] 'Caudal vertebrae - transverse convexity of dorsal midline in distal caudals '
		[127] 'Caudal vertebrae - length of longest prezygapophyses in distal caudals '
		[128] 'Caudal vertebrae - number '
		[129] 'Chevrons - anteroposterior length compared to dorsoventral depth '
		[130] 'Chevrons - transverse convexity of anterior ventral edge in distal elements '
		[131] 'Cervical ribs - length '
		[132] 'Uncinate processes - ossification '
		[133] 'Sternal ribs - ossification '
		[134] 'Gastralia - length of lateral segments '
		[135] 'Sternum - fusion of sternal plates and ventral projection of median surface '
		[136] 'Sternum - shape of lateral edge posterior to rib articulations '
		[137] 'Sternum - surface of coracoid articulation '
		[138] 'Furcula - size of hypocleideum '
		[139] 'Scapula - eversion of dorsal edge of acromion '
		[140] 'Humerus - length '
		[141] 'Coracoid - transverse convexity of posterior edge (anteroposterior convexity of lateral edge in Aves)'
		[142] 'Scapulocoracoid - form of contact between compon ents'
		[143] 'Coracoid - proximodistal elongation '
		[144] 'Coracoid - angle formed in posterior (lateral in Aves) view at level of coracoid tubercle '
		[145] 'Scapula - orientation of glenoid '
		[146] 'Humerus - angle between distal deltopectoral crest edge at apex and posterior edge of shaft at that point '
		[147] 'Humerus - proximodistal placement of deltopectoral crest apex '
		[148] 'Humerus - depth of deltopectoral crest '
		[149] 'Humerus - lateral surface of distal deltopectoral crest '
		[150] 'Ulna - length of olecranon process '
		[151] 'Ulna - transverse convexity of distal end '
		[152] 'Ulna - separation of proximal cotylae'
		[153] 'Manual phalanx I-1 - shape of proximoventral edge '
		[154] 'Distal carpals I and II - form of contact'
		[155] 'Distal carpal I - form of contact with metacarpal I '
		[156] 'Distal carpal II - form of contact with metacarpal II'
		[157] 'Distal carpals I and II - combined transverse width'
		[158] 'Metacarpal I - length compared to metacarpal II '
		[159] 'Manual digit III - number of phalanges '
		[160] 'Manual unguals - proximodistal position of flexor tubercle apex'
		[161] 'Manual ungual I - curvature, measured as maximum distance between ventral edge and line drawn between proximodorsal and distoventral tips divided by length of latter line '
		[162] 'Manual ungual II - curvature, measured as maximum distance between ventral edge and line drawn between proximodorsal and distoventral tips divided by length of latter line '
		[163] 'Manual ungual III - curvature, measured as maximum distance between ventral edge and line drawn between proximodorsal and distoventral tips divided by length of latter line '
		[164] 'Manual unguals - depth of flexor tubercles '
		[165] 'Manual ungual I - size compared to manual ungual II '
		[166] 'Manual ungual I - shape of proximodorsal margin '
		[167] 'Manual ungual II - shape of proximodorsal margin '
		[168] 'Manual ungual III - shape of proximodorsal margin '
		[169] 'Ilium - ventral expansion of preacetabular process '
		[170] 'Ilium - length of preacetabular process, measured from notch below process '
		[171] 'Ilium - angle of anterior edge of preacetabular process '
		[172] 'Ilium - dorsal margin of acetabulum in dorsal/ventral view '
		[173] 'Ilium - lateral surface at dorsal edge posterodorsal to acetabulum '
		[174] 'Ilium - shape of postacetabular process '
		[175] 'Ilium - dorsal postacetabular edge angled posterolaterally'
		[176] 'Ilium - depth of brevis fossa '
		[177] 'Ilium - lateral projection of antitrochanter '
		[178] 'Ilium - posterior extent of m. cuppedicus fossa over pubic peduncle in lateral view '
		[179] 'Ilium - ventral surface on preacetabular process for m. puboischiofemoralis internus (iliofemoralis internus and iliotrochantericus cranialis in Aves)'
		[180] 'Ischium - proximodorsal edge '
		[181] 'Ischium - distal curvature '
		[182] 'Ischium - dorsoventral convexity of lateral surface '
		[183] 'Ischium - proximodistal position of obturator process apex '
		[184] 'Ischium - contact between obturator process and pubis '
		[185] 'Ischium - development of ischial apron'
		[186] 'Ischium - ventral edge of pubic peduncle '
		[187] 'Ischium - length compared to pubis '
		[188] 'Ischium - form of median contact '
		[189] 'Ischium - dorsoventral expansion of distal end '
		[190] 'Pubis - orientation of proximal half in lateral view '
		[191] 'Pubis - anteroposterior length of anterior boot, measured as flare from prior curvature of pubis'
		[192] 'Pubis - anteroposterior length of posterior boot, measured as distal depth of pubis excluding anterior boot '
		[193] 'Pubis - anteroposterior position of apron '
		[194] 'Pubis - curvature in lateral view '
		[195] 'Pubis - proximal extent of symphysis, measured to median edge '
		[196] 'Femur - medial surface of head '
		[197] 'Femur - separation of anterior and greater trochanters '
		[198] 'Femur - section of anterior trochanter in proximal view '
		[199] 'Femur - posterolateral surface at proximal end '
		[200] 'Femur - posterior surface of midshaft '
		[201] 'Femur - convexity of anterior edge of anterior trochanter in lateral view '
		[202] 'Femur - anteromedial surface of distal end '
		[203] 'Femur - distal enclosure of popliteal fossa between distal condyles '
		[204] 'Fibula - contact with proximal tarsals '
		[205] 'Fibula - concavity of proximomedial surface '
		[206] 'Proximal tarsals - depth of concavity between medial and lateral condyles in distal view'
		[207] 'Tibia - anteromedial surface of proximal portion '
		[208] 'Astragalus - height of ascending process, from distal tibiotarsal edge to ascending process apex'
		[209] 'Astragalus - mediolateral width of ascending process '
		[210] 'Astragalus - concavity of medial edge of ascending process '
		[211] 'Astragalus - confluence of condyles and ascending process '
		[212] 'Astragalus - convexity of anterior surface at base of ascending process '
		[213] 'Astragalus - form of contact with tibia '
		[214] 'Astragalus - form of contact with calcaneum '
		[215] 'Distal tarsals - form of contact with metatarsals '
		[216] 'Metatarsals II-IV - extent of fusion '
		[217] 'Metatarsal II - depth of distal articular groove '
		[218] 'Metatarsal III - depth of distal articular groove '
		[219] 'Metatarsal III - proximal transverse constriction '
		[220] 'Metatarsal IV - transverse width at midshaft '
		[221] 'Metatarsal I - presence '
		[222] 'Metatarsal I - proximodistal position'
		[223] 'Metatarsal I - proximal extent '
		[224] 'Pedal ungual II - length on straight line compared to ungual III '
		[225] 'Pedal ungual II - curvature'
		[226] 'Metatarsal IV - transverse width at midshaft compared to metatarsal II'
		[227] 'Skull - depth of snout '
		[228] 'Premaxilla - angle between anterior subnarial and ventral margins '
		[229] 'Premaxilla - subnarial height compared to alveolar length '
		[230] 'Premaxilla and maxilla - space between toothrows of each element '
		[231] 'Maxilla- shape of promaxillary fenestra '
		[232] 'Nasal - convexity of dorsal edge in lateral view'
		[233] 'External naris - length '
		[234] 'Postorbital - length of posterior process '
		[235] 'Frontal - dorsal surface of supratemporal fossa '
		[236] 'Parietal - minimum width '
		[237] 'Parietal - dorsal outline '
		[238] 'Quadrate - proximodistal position of pterygoid process apex '
		[239] 'Basioccipital - shape of notch between basal tubera '
		[240] 'Laterosphenoid - lateral surface dorsal to exit for oculomotor (III) nerve'
		[241] 'Dentary - posterior depth compared to length '
		[242] 'Teeth - DSDI'
		[243] 'Dorsal vertebrae - length of column '
		[244] 'Dorsal vertebrae - centrum proportions of dorsals 6-13 '
		[245] 'Dorsal vertebrae - anteroposterior expansion of neural spine apex in dorsals 6-13 '
		[246] 'Sacral vertebrae - transverse width of ancestral neotheropod sacral centra 1 and 2 '
		[247] 'Caudal vertebrae - distal anteroposterior width of transverse processes on caudals 1-4 '
		[248] 'Caudal vertebrae - length of caudals 10-15 '
		[249] 'Sternal ribs - number which contact dorsal ribs '
		[250] 'Furcula - size '
		[251] 'Coracoid - surface just distal to coracoid tuber '
		[252] 'Scapula - contact between acromion and coracoid '
		[253] 'Scapulocoracoid - length of glenoid edge formed by scapula, with glenoid edge of each bone simplified to a straight line '
		[254] 'Humerus - length compared to femur '
		[255] 'Femur - distal extent of lateral condyle past medial condyle '
		[256] 'Radius - midshaft anteroposterior diameter '
		[257] 'Manual phalanx I-1 - length compared to metacarpal II '
		[258] 'Manual phalanx III-2 - length compared to III-1 '
		[259] 'Manual phalanx III-2 - proximoventral heel, prominence measured as angle between dorsal and ventral edges of element '
		[260] 'Manual phalanx III-3 - dorsoventral depth of shaft just proximal to distal condyles '
		[261] 'Ilium - length '
		[262] 'Ilium - anteroposterior diameter of external acetabulum (measured between lateral surfaces of peduncles, excluding any medial walls or angled anterior and posterior acetabular surfaces)'
		[263] 'Ilium - angle main axis of pubic peduncle projects, compared to line drawn between bases of peduncles'
		[264] 'Pubis - lateral surface of mid shaft '
		[265] 'Ischium - dorsal process at midshaft '
		[266] 'Tibia - surface just posterior to fibular crest '
		[267] 'Pedal phalanx II-2 - length compared to II-1 '
		[268] 'Pedal phalanx II-2 - height of distal condyles compared to length (excluding posterior lips)'
		[269] 'Metatarsal IV - convexity of posterior surface in section '
		[270] 'Pedal phalanx IV-4 - length compared to IV-3 '
		[271] 'Metatarsal V - length compared to metatarsal IV '
		[272] 'Pedal ungual I - depth of the dorsal arc compared to ungual length (measured in a straight line from the proximodorsal tip to the distal tip) '
		[273] 'Pedal unguals III and IV - depth of the dorsal arc compared to ungual length (measured in a straight line from the proximodorsal tip to the distal tip) '
		[274] 'Pedal unguals - cross section of III and IV'
		[275] 'Feathers - presence '
		[276] 'Feathers - arrangement of barbs '
		[277] 'Feathers - length of feathers along metatarsus '
		[278] 'Pubis - angle of posterior pubic boot to shaft '
		[279] 'Chevrons - transverse convexity of posterior ventral edge in distal elements'
		[280] 'Metacarpal I - proportions in dorsal/ventral view '
		[281] 'Manual phalanx I-1 - minimum transverse width '
		[282] 'Angular - posterior extent at ventral mandibular edge '
		[283] 'Surangular - dorsolateral surface just anterior to glenoid '
		[284] 'Metacarpal I - convexity of distal end in dorsal view '
		[285] 'Metacarpal II - convexity of distal end in dorsal view '
		[286] 'Dentary - convexity of anterodorsal edge '
		[287] 'Quadrate - lateral exposure of head '
		[288] 'Ilium - ventral projection of medial brevis ridge '
		[289] 'Femur - development of insertion for M. iliofemoralis externus on proximolateral surface'
		[290] 'Dentary teeth - extent '
		[291] 'Coracoid - depth of subglenoid notch '
		[292] 'Articular - curvature of retroarticular process '
		[293] 'Scapula - lateral surface dorsal to glenoid '
		[294] 'Basioccipital - transverse width across basal tubera '
		[295] 'Metatarsal II - length'
		[296] 'Basioccipital - posterior surface ventrolateral to occipital condyle '
		[297] 'Humerus - transverse width of entepicondyle '
		[298] 'Ilium - convexity of ischial peduncle articular surface '
		[299] 'Teeth - labiolingual compression of roots of lateral teeth '
		[300] 'Ilium - lateral deflection of preacetabular process '
		[301] 'Teeth - recurvature '
		[302] 'Dentary and maxilla - method of tooth implantation '
		[303] 'Pubis - extent of symphyseal contact of aprons '
		[304] 'Ilium - convexity of dorsal edge of postacetabular process '
		[305] 'Ilium - posterolateral edge of postacetabular process in dorsal view '
		[306] 'Pedal phalanx II-2 - length of proximoventral heel compared to height of distal condyles '
		[307] 'Ischium - obturator notch distal to process '
		[308] 'Ischium - angle between edges of obturator process '
		[309] 'Metatarsals II and III - topology of dorsal surface of shaft '
		[310] 'Maxilla - concavity of anterodorsal margin at base of dorsal process '
		[311] 'Maxilla - length of anterior ramus, measured from point of maximum anterodorsal concavity '
		[312] 'Nasal - extent of antorbital fossa on lateral surface '
		[313] 'External mandibular fenestra - length compared to mandibular length '
		[314] 'Anterior teeth - texture of carinae '
		[315] 'Maxilla - posterior extent of teeth '
		[316] 'Metacarpal IV - presence'
		[317] 'Ilium - ventral extent of pubic peduncle compared to ischial peduncle '
		[318] 'Pubis - extent of puboischiadic plate proximally '
		[319] 'Femur - proximal extent of anterior trochanter '
		[320] 'Astragalus - anteroposterior depth of ascending process'
		[321] 'Maxilla - dorsoventral position of maxillary fenestra '
		[322] 'Maxilla - depth of posterior process '
		[323] 'Maxilla - convexity of lateral surface surrounding maxillary fenestra '
		[324] 'Maxilla - size of external portion of dorsal process'
		[325] 'Maxilla - height of antorbital fossa portion of dorsal process '
		[326] 'Nasal - contact with antorbital fossa '
		[327] 'Premaxilla - contact with antorbital fossa '
		[328] 'Jugal - contact with antorbital fenestra '
		[329] 'Splenial - concavity of posterior margin '
		[330] 'Premaxillary teeth - height of first tooth'
		[331] 'Postorbital - angle of anterior process '
		[332] 'Jugal - lateral exposure of posterior process '
		[333] 'Frontal - shape of suture with nasal '
		[334] 'Cervical vertebrae - height of neural spines '
		[335] 'Caudal vertebrae - fusion of distal caudals '
		[336] 'Coracoid - anterior projection of anterodistal margin (medial projection of mediodistal margin in Aves) '
		[337] 'Skull - length compared to femur '
		[338] 'External naris - dorsoventral placement'
		[339] 'Maxilla - posterior extent of medial wall of antorbital fossa '
		[340] 'Maxilla - elongation of maxillary fenestra '
		[341] 'Nasals - median contact '
		[342] 'Nasal - surface texture '
		[343] 'Jugal - minimum suborbital height '
		[344] 'Nasal - length compared to frontal '
		[345] 'Skull - ventral deflection of snout '
		[346] 'Maxilla - length of ventral margin '
		[347] 'Frontal - level of lateral edge of dorsal surface '
		[348] 'Parietal - length compared to frontal '
		[349] 'Laterotemporal fenestra - greatest anteroposterior length '
		[350] 'Exoccipital and basioccipital - transverse width of foramen magnum '
		[351] 'Dentary - depth of Meckelian groove '
		[352] 'Dentary - posterior extent of ventral dentary '
		[353] 'Surangular - lateral surface ventral to glenoid '
		[354] 'Premaxillary teeth - height of longest compared to longest maxillary tooth '
		[355] 'Dentary teeth - presence at tip of dentary '
		[356] 'Cervical vertebrae - elongation'
		[357] 'Dorsal vertebrae - height of neural spines of posterior dorsals (6-13)'
		[358] 'Dorsal vertebrae - posterior extent of postzygapophyses on mid and posterior dorsals (4-13) '
		[359] 'Chevrons - length of proximal chevrons compared to caudal centrum length '
		[360] 'Furcula - interclavicular angle, measured from center of median to tips of arms '
		[361] 'Scapula - angle of posterior edge of acromion '
		[362] 'Scapula - angle of anterior edge of acromion '
		[363] 'Scapulocoracoid - shape of anterior edge at suture '
		[364] 'Scapula - expansion of posterior end '
		[365] 'Coracoid - position of coracoid tuber '
		[366] 'Humerus - minimum width in anterior view compared to length '
		[367] 'Ulna - shape of posterior margin '
		[368] 'Distal carpals I and II - shape of combined proximal surface '
		[369] 'Metacarpal I - height of medial condyle ventrally compared to lateral condyle '
		[370] 'Metacarpal II - medial expansion of proximal end '
		[371] 'Metacarpal III - length compared to metacarpal II '
		[372] 'Metacarpal III - distal extent of contact with metacarpal II '
		[373] 'Metacarpal III - position of proximal end '
		[374] 'Manual phalanx II-2 - length compared to II-1 '
		[375] 'Manual phalanx II-1 - expansion of lateral edge '
		[376] 'Manual digit II - length of II-1 and II-2 compared to metacarpal II '
		[377] 'Manual phalanx I-1 - ventral curvature '
		[378] 'Manual ungual I - dorsal projection of dorsal curve '
		[379] 'Manual ungual II - dorsal projection of dorsal curve '
		[380] 'Manual phalanx III-3 - length compared to combined lengths of III-1 and III-2 '
		[381] 'Ilium - height of preacetabular process, dorsal extent over line drawn between bases of peduncles, compared to height at base of postacetabular process '
		[382] 'Ischium - minimum anteroposterior depth of shaft distal to obturator process compared to pubic shaft '
		[383] 'Tibia - length compared to femur '
		[384] 'Tibia - anterior constriction at base of lateral condyle in proximal view '
		[385] 'Metatarsus - length compared to femur '
		[386] 'Metatarsal II - depth at midshaft '
		[387] 'Metatarsus - distal extent of metatarsal II-IV contacts '
		[388] 'Metatarsus - minimum transverse width distally compared to proximal width '
		[389] 'Metatarsal I - torsion '
		[390] 'Pedal ungual I - length on straight line compared to ungual III '
		[391] 'Manual ungual III - length on straight line compared to ungual II '
		[392] 'Metatarsus - transverse slenderness at midshaft '
		[393] 'Ilium - anteroposterior length of pubic peduncle, measured halfway down'
		[394] 'Pedal phalanx III-1 - slenderness '
		[395] 'Humerus - transverse width of distal end '
		[396] 'Humerus - transverse extent of ectepicondyle '
		[397] 'Metatarsal I - transverse width of distal condyle '
		[398] 'Metacarpal II - length compared to humerus '
		[399] 'Jugal - dorsoventral expansion of anterior process '
		[400] 'Chevrons - anteroventral process on distal chevrons '
		[401] 'Metacarpal III - depth of distal articular groove '
		[402] 'Scapula - dorsoventral depth of acromion '
		[403] 'Metatarsus - medial extent of metatarsal IV posterior to III '
		[404] 'Nasals - transverse convexity of dorsal surface '
		[405] 'Ectopterygoid - anteroposterior position '
		[406] 'Pterygoid - orientation of palatal process '
		[407] 'Articular - contact with surangular '
		[408] 'Cervical ribs - contact with vertebrae '
		[409] 'Caudal vertebrae - pneumaticity of caudal centra 1-5 '
		[410] 'External mandibular fenestra - anteroposterior placement '
		[411] 'Manual ungual II - presence '
		[412] 'Ilium - convexity of anterodorsal edge '
		[413] 'Basioccipital - basal tubera size'
		[414] 'Postorbital - length of anterior process '
		[415] 'Postorbital - angle between ventral and posterior processes (measured with vertex equidistant between orbit, supratemporal and laterotemporal fenestrae, through tips of processes)'
		[416] 'Scapula - medial curvature'
		[417] 'Scapula - sectional shape of posterior half '
		[418] 'Coracoid - convexity of medial (posterior in Aves) surface '
		[419] 'Ulna - height of coronoid process '
		[420] 'Ulna - height of proximomedial process '
		[421] 'Ulna - anterior surface of proximal third '
		[422] 'Ulna - proximal extent of distal articular surface up posterolateral side '
		[423] 'Ulna - position of thickest portion of distal end'
		[424] 'Ulna - anterolateral surface distally '
		[425] 'Ulna - proportions of distal end '
		[426] 'Radius - dorsal projection of distal end '
		[427] 'Radiale - size'
		[428] 'Ulnare - convexity of distal edge'
		[429] 'Ilium - ventral extent of postacetabular process '
		[430] 'Sternum - posterior expansion of posteromedian process'
		[431] 'Pubis - distal extent of posterior median groove '
		[432] 'Tibia - midshaft transverse diameter compared to femur '
		[433] 'Femur - posterior surface of femoral head '
		[434] 'Manual phalanx I-1 - convexity of distoventral surface proximal to condyles '
		[435] 'Tibia - angle of anterior edge of cnemial crest '
		[436] 'Tibia - orientation of cnemial crest in proximal view '
		[437] 'Tibia - proximal extent of fibular crest '
		[438] 'Braincase - prominence of crista prootica '
		[439] 'Astragalus - contact between ascending process and fibula '
		[440] 'Basisphenoid - expansion'
		[441] 'Supraoccipital - posterior median surface '
		[442] 'Vomer - posterior extent '
		[443] 'Dentary - angle of symphysis '
		[444] 'Dentary teeth - labiolingual compression of teeth 1-2'
		[445] 'Teeth - labiolingual compression of lateral tooth crowns '
		[446] 'Cervical vertebrae - transverse convexity of ventral centrum surface'
		[447] 'Dorsal vertebrae - height of neural arch in mid dorsals (4-6)'
		[448] 'Dorsal vertebrae - diameter of parapophysis on mid dorsals (4-6)'
		[449] 'Dorsal vertebrae - division of infrazygapophyseal fossae in mid dorsals (4-6)'
		[450] 'Dorsal vertebrae - inclination of diapophysis in mid dorsals (4-6)'
		[451] 'Dorsal vertebrae - anterior bifurcation of neural spine in dorsal view '
		[452] 'Dorsal vertebrae - posterior bifurcation of neural spine in dorsal view '
		[453] 'Sacral vertebrae - fusion of neural spines '
		[454] 'Furcula - curvature of arms '
		[455] 'Scapula - dorsal edge of scapular blade '
		[456] 'Humerus - size of bicipital crest'
		[457] 'Humerus - angle of bicipital crest in proximal view '
		[458] 'Humerus - separation of bicipital crest from humeral head '
		[459] 'Humerus - shape of bicipital crest'
		[460] 'Humerus - posteromedial surface of midshaft '
		[461] 'Humerus - anterior surface proximal to ectepicondyle '
		[462] 'Humerus - angle of torsion between long axes of proximal and distal ends '
		[463] 'Humerus - anterior flexure of distal end '
		[464] 'Humerus - shape of entepicondyle '
		[465] 'Humerus - anteromedial surface proximal to entepicondyle '
		[466] 'Metacarpal I - ventrolateral surface '
		[467] 'Metacarpal III - convexity of lateral margin '
		[468] 'Manual ungual II - length compared to metacarpal II '
		[469] 'Ilium - distance between dorsal edge of mid ilium and sacral neural spines '
		[470] 'Ilium - lateral surface of posterodorsal corner of postacetabular process '
		[471] 'Ilium - transverse compression of pubic peduncle distal surface'
		[472] 'Ilium - angle pubic peduncle distal articular surface projects '
		[473] 'Ilium - ventral extent of antitrochanter'
		[474] 'Ilium - shape of antitrochanter '
		[475] 'Ischium - proximal enclosure of obturator notch '
		[476] 'Ischium - proximodorsal position of mid dorsal process'' apex'
		[477] 'Pubis and ischium - shape of subacetabular contact '
		[478] 'Pubis - anteroposterior expansion of distal shaft '
		[479] 'Femur - angle of femoral head to shaft '
		[480] 'Femur - anteroposterior constriction of femoral head in proximal view '
		[481] 'Femur - anteroposterior width of greater trochanter '
		[482] 'Femur - ventral constriction of femoral head '
		[483] 'Tibia - depth of incisura tibialis compared to proximal width of tibia'
		[484] 'Tibia - transverse compression of proximal end '
		[485] 'Tibia - distal extent of fibular crest '
		[486] 'Fibula - angle of proximal edge '
		[487] 'Fibula - proximodistal position of iliofibularis tubercle apex'
		[488] 'Fibula - transverse width of posterior half in proximal view '
		[489] 'Tibia - distal exposure of lateral condyle '
		[490] 'Femur - convexity of proximal surface between head and greater trochanter '
		[491] 'Maxillary teeth - position of largest teeth'
		[492] 'Tibia - anterior exposure of mediodistal corner of tibia '
		[493] 'Caudal vertebrae - separation of tip of distal caudal prezygapophyses '
		[494] 'Braincase - confluence of otic recess and lateral depression '
		[495] 'Postorbital and jugal - minimum anteroposterior length of postorbital bar '
		[496] 'Lacrimal - separation from postorbital dorsal to orbit '
		[497] 'Premaxillary teeth - labiolingual compression '
		[498] 'Premaxillary teeth - lingual surface '
		[499] 'Infratemporal fenestra - posterior constriction caused by squamosal and quadratojugal '
		[500] 'Nasals - convexity of dorsolateral surface '
		[501] 'Ilium - lateral surface dorsal to acetabulum '
		[502] 'Nasal - lateral surface along or inside antorbital fossa '
		[503] 'Articular - transverse width of retroarticular process '
		[504] 'Basioccipital and basisphenoid - transverse width across basipterygoid processes '
		[505] 'Ischium - transverse convexity of acetabular surface '
		[506] 'Paraquadrate foramen - dorsoventral size '
		[507] 'Paraquadrate foramen - composition of lateral edge '
		[508] 'Axis - dorsal transverse expansion of neural spine '
		[509] 'Ilium - extent of supracetabular crest along pubic peduncle '
		[510] 'Scapula - convexity of dorsal acromial edge '
		[511] 'Basisphenoid - lateral walls of basisphenoid recess '
		[512] 'Quadratojugal - convexity of external surface '
		[513] 'Nasal - convexity of lateral edge '
		[514] 'Metatarsal III - shape of medial edge when articulated, taking into account curvature of shaft'
		[515] 'Ilium - convexity of pubic peduncle articular surface '
		[516] 'Ilium - distal anteroposterior expansion of pubic peduncle '
		[517] 'Axis - lateral surface of centrum '
		[518] 'Maxilla - medial wall of maxillary antrum '
		[519] 'Surangular - dorsoventral depth at intersection of dentary and external mandibular fenestra '
		[520] 'Pedal ungual II - convexity of posteroventral edge between articular facet and flexor tubercle'
		[521] 'Sternum - ossification '
		[522] 'Pedal digit II - length compared to pedal digit IV, excluding metatarsals and unguals '
		[523] 'Metatarsal III - transverse medial and lateral bulges on shaft just proximal to articular condyle'
		[524] 'Metatarsal II - length compared to metatarsal IV'
		[525] 'Metatarsal IV - projection of lateral surface dorsal to lateral flexor ridge on distal end'
		[526] 'Maxilla - posterior extent of postantral wall '
		[527] 'Teeth - texture of labial and lingual surfaces '
		[528] 'Dorsal vertebrae - anterior projection of interspinal ligament scars on neural spine '
		[529] 'Maxilla - lateral exposure of promaxillary fenestra '
		[530] 'Antorbital fossa - proportions '
		[531] 'Jugal - length of posterior process '
		[532] 'Furcula - cross section of omal ends of arms '
		[533] 'Cervical vertebrae - post-axial central pneumatization '
		[534] 'Caudal vertebrae - relationship of zygapophyses '
		[535] 'Uncinate processes - articulation to dorsal ribs '
		[536] 'Ulna - posterior projection of dorsal condyle '
		[537] 'Ischium - distal extent of pubic contact '
		[538] 'Nasals - transverse convexity of combined dorsal surface '
		[539] 'Jugal - convexity of anterior tip '
		[540] 'Radius - length compared to humerus '
		[541] 'Premaxillae - form of contact at symphysis '
		[542] 'Dentaries - form of contact at median '
		[543] 'Dentary - anteroventral surface of tip '
		[544] 'Premaxilla - length of ventral margin '
		[545] 'Premaxilla - length of dorsal process '
		[546] 'Vomer - extent of contact with pterygoid '
		[547] 'Palatine - extent of contact with pterygoid '
		[548] 'Palatine - contact with premaxilla '
		[549] 'Vomer - contact with premaxilla '
		[550] 'Basisphenoid - anteroposterior position of basipterygoid processes '
		[551] 'Basisphenoid - orientation of articulation with pterygoid'
		[552] 'Pterygoid - convexity of articulation with basisphenoid '
		[553] 'Pterygoid - angle between palatal process and posterior end in lateral view'
		[554] 'Interorbital septum - ossification'
		[555] 'Mesethmoid - anterior extent '
		[556] 'Basisphenoid - lateromedial position of ossified eustachian tubes '
		[557] 'Basisphenoid - ventral surface anterior to basisphenoid recess '
		[558] 'Squamosal - length of ventral process '
		[559] 'Quadrate - form of articulation with pterygoid '
		[560] 'Quadrate - position of articulation with pterygoid '
		[561] 'Quadrate - convexity of pterygoid articulation '
		[562] 'Quadrate - anterolateral surface on dorsal portion of pterygoid process '
		[563] 'Quadrate - form of articulation with quadratojugal '
		[564] 'Quadrate - proximal articulation with prootic and/or opisthotic '
		[565] 'Quadrate - number of distal condyles on posterior edge'
		[566] 'Articular - pneumaticity '
		[567] 'Splenial - anterior extent '
		[568] 'Dentaries - transverse convexity of posterior symphysis '
		[569] 'Dentaries - dorsal surface of fused symphysis '
		[570] 'Dentaries - arrangement of symphyseal foramina '
		[571] 'Dentaries - position of symphyseal foramina '
		[572] 'Splenial - medial overlap of Meckelian groove '
		[573] 'Jugal - contact with postorbital '
		[574] 'Frontal - contact with parietal '
		[575] 'Cervical vertebrae - convexity of posterior articular surface '
		[576] 'Dorsal vertebrae - size of hypapophyses on dorsals posterior to third '
		[577] 'Dorsal vertebrae - number '
		[578] 'Dorsal vertebrae - anteroposterior position of parapophyses '
		[579] 'Dorsal vertebrae - transverse compression of centra '
		[580] 'Dorsal vertebrae - convexity of lateral centrum surface '
		[581] 'Dorsal vertebrae - connection of adjacent transverse processes '
		[582] 'Dorsal vertebrae - fusion '
		[583] 'Sacrum - length of ancestral avepod thirteenth dorsal and first two sacral centra '
		[584] 'Caudal vertebrae - length of transverse processes in caudals 1-5'
		[585] 'Caudal vertebrae - number fused into pygostyle '
		[586] 'Gastralia - ossification '
		[587] 'Sternum - extent of ventral median keel '
		[588] 'Sternum - pneumatization of dorsal surface '
		[589] 'Sternum - pneumatization of lateral edge between sternal rib articulations '
		[590] 'Sternum - distance between coracoid sulci '
		[591] 'Sternum - number of sternal ribs that contact sternum '
		[592] 'Sternum - topology of ventral surface lateral to midline '
		[593] 'Sternum - shape of posterior edge near midline '
		[594] 'Clavicles - median fusion '
		[595] 'Furcula - shape of omal tips in dorsal/ventral view '
		[596] 'Furcula - shape of ventral edge '
		[597] 'Scapulocoracoid - convexity of mobile articulation '
		[598] 'Coracoid - topology of anterior (medial in Aves) edge near level of scapular articulation '
		[599] 'Coracoid - convexity of posterior (lateral in Aves) margin of distal portion '
		[600] 'Coracoid - pneumatization of proximal area, near scapular articulation or coracoid tuber '
		[601] 'Coracoid - pneumatization of mediodistal (posterodistal in Aves) area, near sternal articulation '
		[602] 'Coracoid - shape of posterior (lateral in Aves) edge just proximal to sternal articulation '
		[603] 'Coracoid - topology of posterior area of lateral surface (lateral area of anterior surface in Aves)'
		[604] 'Coracoid - shape of acrocoracoid process '
		[605] 'Coracoid - position of supracoracoid nerve '
		[606] 'Coracoid - convexity of external surface surrounding coracoid foramen '
		[607] 'Coracoid - size of portion proximal to biceps tuber '
		[608] 'Scapula - curvature of shaft in lateral view '
		[609] 'Scapula - curvature of acromion '
		[610] 'Humerus - convexity of proximal edge of humeral head when viewed perpendicular to long axis'
		[611] 'Humerus - closure of capital groove '
		[612] 'Humerus - convexity of anterior edge of head in proximal view '
		[613] 'Humerus - separation of head from more distal humerus on anterior surface '
		[614] 'Humerus - orientation of deltopectoral crest in proximal view '
		[615] 'Humerus - convexity of proximolateral/posterior surface of deltopectoral crest '
		[616] 'Humerus - surface of deltopectoral crest '
		[617] 'Humerus - surface of bicipital crest '
		[618] 'Humerus - position of m. scapulohumeralis posterior insertion '
		[619] 'Humerus - medial (anterior in Aves) projection of bicipital crest '
		[620] 'Humerus - proximal pneumaticity '
		[621] 'Humerus - orientation of ectocondyle '
		[622] 'Humerus - shape of entocondyle '
		[623] 'Humerus - angle of distal edge '
		[624] 'Humerus - anterior surface just proximal to condyles '
		[625] 'Humerus - size of entocondyle '
		[626] 'Humerus - lateral side of posterior surface on distal end '
		[627] 'Humerus - medial side of posterior surface on distal end '
		[628] 'Ulna - separation of lateral and medial cotylae '
		[629] 'Ulna - convexity of lateral cotyla '
		[630] 'Ulna - anteroproximal surface '
		[631] 'Ulna - anteromedial surface of proximal end '
		[632] 'Radius - posterolateral surface '
		[633] 'Ulnare - length of medial (ventral) ramus '
		[634] 'Metacarpal III - distal contact with metacarpal II '
		[635] 'Metacarpal III - minimum transverse width compared to minimum transverse width of metacarpal II '
		[636] 'Metacarpal I - development of medial process for insertion of m. extensor metacarpi ulnaris'
		[637] 'Metacarpal I - proximodistal convexity of medial edge '
		[638] 'Metacarpal II - proximal part of ventral surface '
		[639] 'Distal carpal I - ventral surface '
		[640] 'Metacarpal III - distal extent '
		[641] 'Metacarpal II - dorsolateral surface near middle of shaft '
		[642] 'Manual phalanx II-1 - projection of laterodistal margin '
		[643] 'Pubis - contact with ilium '
		[644] 'Ischium - contact with ilium '
		[645] 'Pubis - contact with ischium '
		[646] 'Ischium - contact between mid dorsal process and ilium '
		[647] 'Ischium - contact between proximodorsal process and ilium '
		[648] 'Ilium - position of antitrochanter '
		[649] 'Pelvis - development of pubic tubercle on anterolateral surface of proximal pubis or pubic peduncle of ilium'
		[650] 'Ilia - contact between dorsal edges of preacetabular processes or between dorsal edges and sacral neural spines'
		[651] 'Ilium - overlap with last dorsal rib '
		[652] 'Ilium - orientation of postacetabular process in section '
		[653] 'Ilium - internal surface of postacetabular process '
		[654] 'Pubis - transverse compression of midshaft '
		[655] 'Femur - convexity of anterior edge of distal end'
		[656] 'Femur - confluence between lateral condyle and ectocondylar tuber '
		[657] 'Femur - posterior projection of posterior surface just proximal to lateral condyle '
		[658] 'Femur - transverse position of lateral edge of ectocondylar tuber or tibiofibular crest '
		[659] 'Astragalocalcaneum - anterior projection of medial condyle '
		[660] 'Tibiotarsus - lateral side of anterior surface just proximal to distal condyles '
		[661] 'Astragalus - anterior surface of ascending process '
		[662] 'Astragalocalcaneum - transverse width of medial condyle '
		[663] 'Astragalocalcaneum - convexity of anterior edge of medial condyle '
		[664] 'Tibia - proximal extent of trochlea for the tibial cartilage on the posterior surface of the distal end '
		[665] 'Tibia - definition of lateral and medial edges of trochlea for the tibial cartilage on the posterior surface of the distal end '
		[666] 'Tibia - distal transverse expansion '
		[667] 'Metatarsal V - presence '
		[668] 'Tarsometatarsus - proximal surface '
		[669] 'Tarsometatarsus - proximal part of posterior surface '
		[670] 'Metatarsus - dorsal and ventral surface near proximal end between metatarsals III and IV '
		[671] 'Metatarsus - dorsal and ventral surface near proximal end between metatarsals II and III '
		[672] 'Metatarsal I - posterior curvature '
		[673] 'Metatarsal II - surface for articulation of metatarsal I '
		[674] 'Metatarsal II - transverse width of trochlea '
		[675] 'Metatarsal IV - transverse width of trochlea '
		[676] 'Metatarsus - distal surface between fused metatarsals III and IV '
		[677] 'Metatarsal III - proximal extent of lateral trochlear edge on posterior surface '
		[678] 'Chevrons - length of posterodistal process on distal caudals '
		[679] 'Exoccipital - length of metotic strut, measured from base of paroccipital process to tip of basal tuber '
		[680] 'Basisphenoid - lateral surface ventral to trigeminal (V) nerve foramen and anteroventral to otic recess'
		[681] 'Basisphenoid - position of anterior tympanic recess '
		[682] 'Pedal phalanx II-2 - height of distal end'
		[683] 'Ulna - size of lateral cotyla'
		[684] 'Quadratojugal - size '
		[685] 'Frontal - surface of articulation for postorbital '
		[686] 'Furcula - cross section of center '
		[687] 'Furcula - width of epicleidial ends '
		[688] 'Furcula - width of arms '
		[689] 'Furcula - anterior surface of hypocleidium '
		[690] 'Furcula - symmetry '
		[691] 'Furcula - robusticity '
		[692] 'Distal caudal vertebrae - separation of postzygapophyses '
		[693] 'Metatarsal III - dorsal surface proximal to articular area and extensor fossa '
		[694] 'Astragalocalcaneum - proximodistal height of lateral condyle '
		[695] 'Astragalus - anterior surface at base of ascending process '
		[696] 'Coracoid - lateral (anterior in Aves) surface for origin of M. biceps brachii '
		[697] 'Manual ungual I - exclosure of proximoventral vascular grooves '
		[698] 'Maxilla - lateral surface ventral to antorbital fossa '
		[699] 'Pubis - abruptness of pubic boot anteroposterior expansion '
		[700] 'Astragalus - anterior surface of center of body '
		;
	STATELABELS
		1
			'longer or subequal to trailing vane '
			'shorter than trailing vane ',
		2
			'ends anterior to antorbital fossa '
			'extends posterior to anterior edge of antorbital fossa ',
		3
			'solid '
			'pneumatized via fossae',
		4
			'solid '
			'with small maxillary fenestra entering maxillary antrum, greatest diameter <15% of orbit+jugal height '
			'with large maxillary fenestra 15-27% of orbit+jugal height'
			'with large maxillary fenestra >27% of orbit+jugal height',
		5
			'fully visible laterally '
			'external surface projects dorsally to form a lip that overlaps ventral edge of antorbital fossa ',
		6
			'close to anterior edge of antorbital fossa (distance between them <11% of orbit+jugal height)'
			'far from anterior edge of antorbital fossa (>10%)',
		7
			'solid '
			'with promaxillary fenestra entering promaxillary recess',
		8
			'>66% '
			'<67%'
			' '
			' '
			' '
			' '
			' '
			' '
			' '
			' '
			' ',
		9
			'with projecting orbital process '
			'smoothly curved or straight '
			' '
			' '
			' '
			' '
			' '
			' '
			' '
			' '
			' ',
		10
			'concave to minimally convex (0-5% of orbit+jugal height) '
			'strongly convex (>5%)',
		11
			'greatest diameter >24% orbital height '
			'<25%',
		12
			'separated by a surface which is not bounded by walls and depressed '
			'both within a common lateral depression bounded on all sides',
		13
			'none '
			'at least one pair separated at midline ',
		14
			'confluent with lateral surface '
			'depressed from lateral surface',
		15
			'flat to convex'
			'concave, forming paracondylar recess',
		16
			'flat '
			'excavated by an extension of the anterior tympanic recess ',
		17
			'excavated by subotic recess, an extension of the anterior temporal recess '
			flat,
		18
			'between basisphenoid and basioccipital '
			'entirely within basisphenoid ',
		19
			'pneumatic median recess present '
			'flat to convex',
		20
			'absent, process rodlike or vertically platelike '
			present,
		21
			'less than 51 degrees laterally from vertical '
			'>50 degrees',
		22
			'>7% of median occipital condyle height '
			'<8% but present'
			absent,
		23
			'absent, process solid '
			'present, process hollow',
		24
			'flat '
			'excavated by shallow depression for dorsal tympanic recess'
			'excavated by posterolaterally directed cavity for dorsal tympanic recess',
		25
			'flat '
			'excavated by extension of posterior tympanic recess ',
		26
			'flat '
			'excavated by main diverticulum of posterior tympanic recess ',
		27
			'on anterior surface of paroccipital process '
			'opens into otic recess',
		28
			'does not contact nasal '
			'contacts nasal, but does not extend posterior to external naris'
			'extends posterior to external naris ',
		29
			'transversely compressed or not compressed '
			'dorsoventrally compressed',
		30
			'low, so that snout is pointed '
			'high, so that snout is rounded ',
		31
			'smooth '
			crenulated,
		32
			'anterior edge of choana placed <18% down maxillary length '
			'>17%',
		33
			'absent '
			'present, forming ''tooth-like'' process ',
		34
			'>34% of orbit+jugal height, measured from lower edge of orbit'
			'<35% ',
		35
			'height of orbit taken up by ventral process / orbital height <80% '
			'>79%',
		36
			'transversely compressed '
			'dorsoventrally or not compressed',
		37
			'present, surface invaded by pneumatic diverticulum of antorbital sinus '
			'absent, surface solid',
		38
			'penetrated by foramen '
			solid,
		39
			'<36% of length of rest of quadratojugal '
			'>35%',
		40
			'sutured '
			fused
			' '
			' '
			' '
			' '
			' '
			' '
			' '
			' '
			' ',
		41
			'unprojected '
			'with lateral ridge or boss projecting dorsally, forming lacrimal horn '
			' '
			' '
			' '
			' '
			' '
			' '
			' '
			' '
			' ',
		42
			'unprojected or minimally projected '
			'strongly projected ',
		43
			'solid '
			'pneumatized via foramen',
		44
			'<15% of ventral process length, measured from internal corner'
			'15-30%'
			'>30%',
		45
			'<131% of ventral process length, measured from internal corner '
			'>130% ',
		46
			'large, greatest length >34% of orbit+jugal height '
			'small, <35% of orbit+jugal height '
			'absent or fused to another element',
		47
			'anteriorly convex <60 degrees '
			'anteriorly convex 60 degrees or more to posteriorly convex',
		48
			'completely posteriorly concave to straight '
			'with posteriorly convex portion ',
		49
			'straight to smoothly curved '
			'abruptly angled at postorbital process',
		50
			'smooth '
			'notched anterolaterally ',
		51
			'decurved to straight '
			upcurved,
		52
			'far, leaving flat dorsal surface between them '
			'close, separated by ridge forming sagittal crest '
			' '
			' '
			' '
			' '
			' '
			' '
			' '
			' '
			' ',
		53
			'sutured '
			fused
			' '
			' '
			' '
			' '
			' '
			' '
			' '
			' '
			' ',
		54
			'<60 degrees from posterior quadrate edge '
			'>59 degrees',
		55
			'smooth '
			'horizontal ridge over ventral process, extends to posterior process ',
		56
			'contacting '
			'non-contacting',
		57
			'if present, articular surface confluent with shaft and squamosal head '
			'distinct otic head caused by intercotylar incisure',
		58
			'inside angle <106 degrees '
			'>105 degrees ',
		59
			'<30% of width across quadrate condyles '
			'>29%',
		60
			'solid '
			'invaded by diverticulum of the tympanic airsac ',
		61
			'transversely elongate or height and width equal '
			'height greater than width ',
		62
			'posteromedially sloped '
			'constricted forming condylar neck ',
		63
			'height halfway out from lateral edge of occipital condyle / length from lateral edge of occipital condyle to tip of process <71% '
			'>70%',
		64
			'long axis angled ventrally <41 degrees from horizontal '
			'>40 degrees',
		65
			'untwisted '
			'twisted so that distal ends face posterodorsally',
		66
			'flat '
			'excavated by a pneumatic fossa ',
		67
			'flat '
			'excavated by pneumatic fossa ',
		68
			'projects ventrolaterally from element'
			unprojected,
		69
			'projected to form posterior concavity between it and main palatine body '
			unprojected,
		70
			'absent '
			present,
		71
			'none '
			low
			high,
		72
			'smooth or with small coronoid eminence '
			'with prominent coronoid eminence ',
		73
			'anterior depth at symphysis <60% of maximum posterior depth'
			'>59% ',
		74
			upcurved
			'straight '
			downcurved,
		75
			'roughly flat '
			'with horizontal shelf ',
		76
			'absent '
			'<8% mandibular length, measured parallel to long axis of mandible '
			'>8% mandibular length',
		77
			'on flat surface '
			'inside longitudinal groove',
		78
			'straight to evenly convex'
			'with distinct process ',
		79
			'convex to straight'
			concave,
		80
			'absent '
			'small foramen'
			'enlarged fenestra',
		81
			'absent or narrow '
			broad,
		82
			'large '
			small
			absent,
		83
			'on level with rest of element '
			'projected dorsally into distinct process ',
		84
			'taller than long to equidimensional '
			'longer than tall ',
		85
			'concave to flat in lateral view '
			convex,
		86
			'toothed '
			toothless,
		87
			'smaller to equal in size '
			'much larger ',
		88
			'toothed '
			toothless,
		89
			'present on mesial and distal carinae '
			'absent on mesial carinae but present on distal carinae '
			'absent on mesial and distal carinae '
			' '
			' '
			' '
			' '
			' '
			' '
			' '
			' ',
		90
			'1-11'
			'12-24'
			'25-30'
			'>30',
		91
			'>15% of orbit + jugal height '
			'5-15%'
			'<5%',
		92
			'<26 on distal carina '
			'>25',
		93
			'symmetrically rectangular to rounded '
			'hooked apically',
		94
			'constricted mesial and/or distal edges '
			'undifferentiated mesial and distal edges ',
		95
			'smaller than posterior two thirds of teeth'
			'similar to posterior third of teeth, leaving teeth in the middle third the largest'
			'larger than posterior two thirds of teeth',
		96
			'anterior more widely spaced '
			'subequal spacing '
			'anterior more closely spaced ',
		97
			'undifferentiated from interdental septa and/or main body of element '
			'forms distinct interdental plates ',
		98
			'joined into median lamina '
			'separated over neural canal ',
		99
			'subequally or more convex compared to labial surface'
			'much flatter to concave',
		100
			'ten or less '
			'eleven or more ',
		101
			'does not extend past postzygapophyses '
			'extend past postzygapophyses ',
		102
			'deep, broadly connecting neural spine with postzygapophyses '
			'narrow to absent, so that neural spine and postzygapophyses are separated',
		103
			'partly over postzygapophyseal facets'
			'anterior to postzygapophyseal facets',
		104
			'completely under neural arch '
			'extending posteriorly past neural arch',
		105
			'convex or flat '
			'transversely concave due to carotid processes ',
		106
			'less than 1.71 times wider than tall '
			'over 1.70 times wider than tall ',
		107
			'length / neural arch length excluding epipophyses >29% '
			'<30%',
		108
			'one pair anteriorly located behind parapophyses '
			'two pairs',
		109
			'flat or concave '
			convex
			'convex dorsoventrally, concave horizontally ',
		110
			'flat or concave '
			convex
			'convex dorsoventrally, concave horizontally ',
		111
			'hypapophyses absent or all less than 25% of posterior central articular surface height '
			'at least one hypapophysis more than 25% of posterior central articular surface height',
		112
			'parapophysis width measured from ventromedial corner <20% of centrum width '
			'>19%',
		113
			'undifferentiated from postzygapophyseal facet '
			'bent ventrally to form hyposphene which articulates with hypantrum on previous vertebra ',
		114
			'absent '
			'only present anteriorly'
			'present in anterior and posterior dorsals ',
		115
			'project far beyond prezygapophyses laterally '
			'project slightly past prezygapophyses laterally (distance from midline to transverse process tip / distance from midline to prezygapophysis tip <180% for d1, <200% for d2, <215% for d3 and <250% for d4)',
		116
			'<151% of minimum neural spine width '
			'>150%',
		117
			'less than 6 '
			'6'
			'7'
			'8'
			'9'
			'10'
			'11-14'
			'>14',
		118
			'transversely rounded '
			'transversely flattened with median groove on some '
			'with median keel on some ',
		119
			'none '
			'at least one vertebra but not present in all '
			all,
		120
			'concave to flat '
			convex,
		121
			'each zygapophyseal articulation distinct from that of adjacent vertebrae '
			'zygapophyseal articulations joined to form ridge',
		122
			'eleven or more '
			'seven to ten '
			'less than seven ',
		123
			'rounded '
			rectangular,
		124
			'convexly rounded, flat or grooved '
			'with a median keel ',
		125
			'convex or flat '
			'concave to form accessory anterior spine ',
		126
			'narrowly convex to form neural spine '
			'flat with no spine or groove '
			'concave to form median groove',
		127
			'<33% of centrum length '
			'33-100% of centrum length '
			'>100% of centrum length ',
		128
			'>40'
			'25-40'
			'21-24'
			'<21',
		129
			'<76% through chevron 10 '
			'>75% by chevron 10 ',
		130
			'convex to straight '
			'concave to form bifurcated anterior ventral process ',
		131
			'greater than centrum '
			'equal or less than centrum ',
		132
			'unossified or absent '
			ossified
			' '
			' '
			' '
			' '
			' '
			' '
			' '
			' '
			' ',
		133
			'unossified or absent '
			ossified
			' '
			' '
			' '
			' '
			' '
			' '
			' '
			' '
			' ',
		134
			'shorter than medial segment '
			longer,
		135
			'sternal plates unfused, without ventral keel '
			'sternal plates fused, without ventral keel '
			'sternal plates fused, with low ventral keel'
			'sternal plates fused, with tall ventral keel '
			' '
			' '
			' '
			' '
			' '
			' '
			' ',
		136
			'evenly rounded or straight '
			'distinct posterolateral process present '
			' '
			' '
			' '
			' '
			' '
			' '
			' '
			' '
			' ',
		137
			'concave dorsoventrally forming groove '
			convex,
		138
			'absent '
			'small ridge or tubercle '
			'large process ',
		139
			'absent, acromion completely dorsally to medially projected '
			'present, edge of acromion laterally projected ',
		140
			'less or equal to scapula '
			'greater than scapula ',
		141
			'convex to flat '
			'concave forming subglenoid fossa ',
		142
			'sutured or freely articulated'
			fused
			' '
			' '
			' '
			' '
			' '
			' '
			' '
			' '
			' ',
		143
			'proximodistal depth <91% of anteroposterior length from anterior edge to glenoid (mediolateral length from medial edge to glenoid in Aves)'
			'91-200%'
			'>200% ',
		144
			'<31 degrees'
			'>30 degrees ',
		145
			'mostly on ventral edge '
			'wraps onto lateral surface',
		146
			'>85 degrees '
			'46-85 degrees'
			'<46 degrees',
		147
			'<30% of element length'
			'30-50%'
			'>50%',
		148
			'width of humerus at deepest part of deltopectoral crest <301% minimal shaft depth '
			'>300%',
		149
			'flat '
			'with longitudinal ridge',
		150
			'proximal tip to apex of coronoid process compared to length of element <15%'
			'15-25%'
			'>25%',
		151
			'rather straight to concave'
			'highly convex',
		152
			'single cotyla'
			'separate cotylae',
		153
			'convex to flat '
			'concave due to flexor tubera',
		154
			'unfused '
			fused
			' '
			' '
			' '
			' '
			' '
			' '
			' '
			' '
			' ',
		155
			unfused
			fused
			' '
			' '
			' '
			' '
			' '
			' '
			' '
			' '
			' ',
		156
			'unfused '
			fused
			' '
			' '
			' '
			' '
			' '
			' '
			' '
			' '
			' ',
		157
			'covers >74% of proximal transverse width of metacarpals I and II '
			'<75%',
		158
			'<50% '
			'50-65%'
			'66-80%'
			'>80%',
		159
			'four '
			three
			two
			one
			none,
		160
			'<25% down length of ungual (measured on the ventral curve, excluding the tubercle) '
			'>24%',
		161
			'>16% '
			'10-16%'
			'<10%',
		162
			'>16% '
			'10-16%'
			'<10%',
		163
			'>16% '
			'10-16%'
			'<10%',
		164
			'>32% of articular facet height '
			'<33%',
		165
			'smaller '
			'equal to three times larger '
			'over three times larger',
		166
			'smoothly convex '
			'with lip rising dorsally',
		167
			'smoothly convex '
			'with lip rising dorsally ',
		168
			'smoothly convex '
			'with lip rising dorsally ',
		169
			'expansion (measured as distance preacetabular tip extends ventrally past highest point at ventral edge of preacetabular process / height of preacetabular process at that point) >18% '
			'<19% but present'
			absent,
		170
			'<50% of postacetabular length, measured from posterior edge of ischial peduncle base'
			'50-120%'
			'>120%',
		171
			'less than 11 degrees posteroventrally '
			'10-70 degrees posteroventrally '
			'more than 70 degrees posteroventrally, often being the anteroventral edge of a round process ',
		172
			'markedly convex due to well developed supracetabular crest '
			'slightly convex due to poorly developed supracetabular crest'
			'straight or concave due to absence of supracetabular crest ',
		173
			'flat '
			'developed into supratrochanteric process ',
		174
			'quadrangular posteriorly '
			'triangular posteriorly',
		175
			'<11 degrees between right and left ilia '
			'>10 degrees',
		176
			'deep '
			shallow
			absent,
		177
			'undifferentiated from supracetabular area and postacetabular process '
			'projected further laterally ',
		178
			'over at least half of peduncle '
			'over less than half ',
		179
			'forms cuppedicus fossa which is overhung laterally '
			'forms flat surface or laterally angled fossa which is not overhung laterally'
			'muscles attach to undifferentiated blade of ilium ',
		180
			'unprojected '
			'projected into low process separated from ilial peduncle by shallow concavity'
			'projected into tall process and separated from ilial peduncle by notch',
		181
			'curved dorsally'
			straight
			'curved ventrally',
		182
			concave
			'flat or convexly rounded'
			ridged,
		183
			'<34% down shaft'
			'34-66%'
			'>66%',
		184
			'absent '
			present,
		185
			'notch proximally between obturator process and pubic peduncle '
			'notch enclosed fully forming obturator foramen '
			'no ventral projection or foramen in ischium ventral margin',
		186
			flat
			'projected as obturator tuber ',
		187
			'>100% '
			'66-100%'
			'50-65%'
			'<50%',
		188
			'fused '
			'unfused but contacting '
			'no contact',
		189
			'wider than shaft '
			'narrower or equal to shaft',
		190
			'<67 degrees from anteriorly horizontal'
			'67-120 degrees'
			'121-150 degrees'
			'>150 degrees',
		191
			'>3% of pubic length '
			'<4%',
		192
			'>29% of pubic length '
			'15-29%'
			'6-14%'
			'<6%',
		193
			'in middle or at posterior edge of shaft '
			'at anterior edge of shaft',
		194
			'anteriorly concave '
			'straight or sigmoid'
			'posteriorly concave',
		195
			'>41% of pubic length '
			'<42% but present'
[truncated: 2,360 more rows]
